# Supplementary material
Source: publisher figshare collection journal article supplement (https://tandf.figshare.com/articles/dataset/_/5142154)

Rate of change of the likelihood distribution (mean)

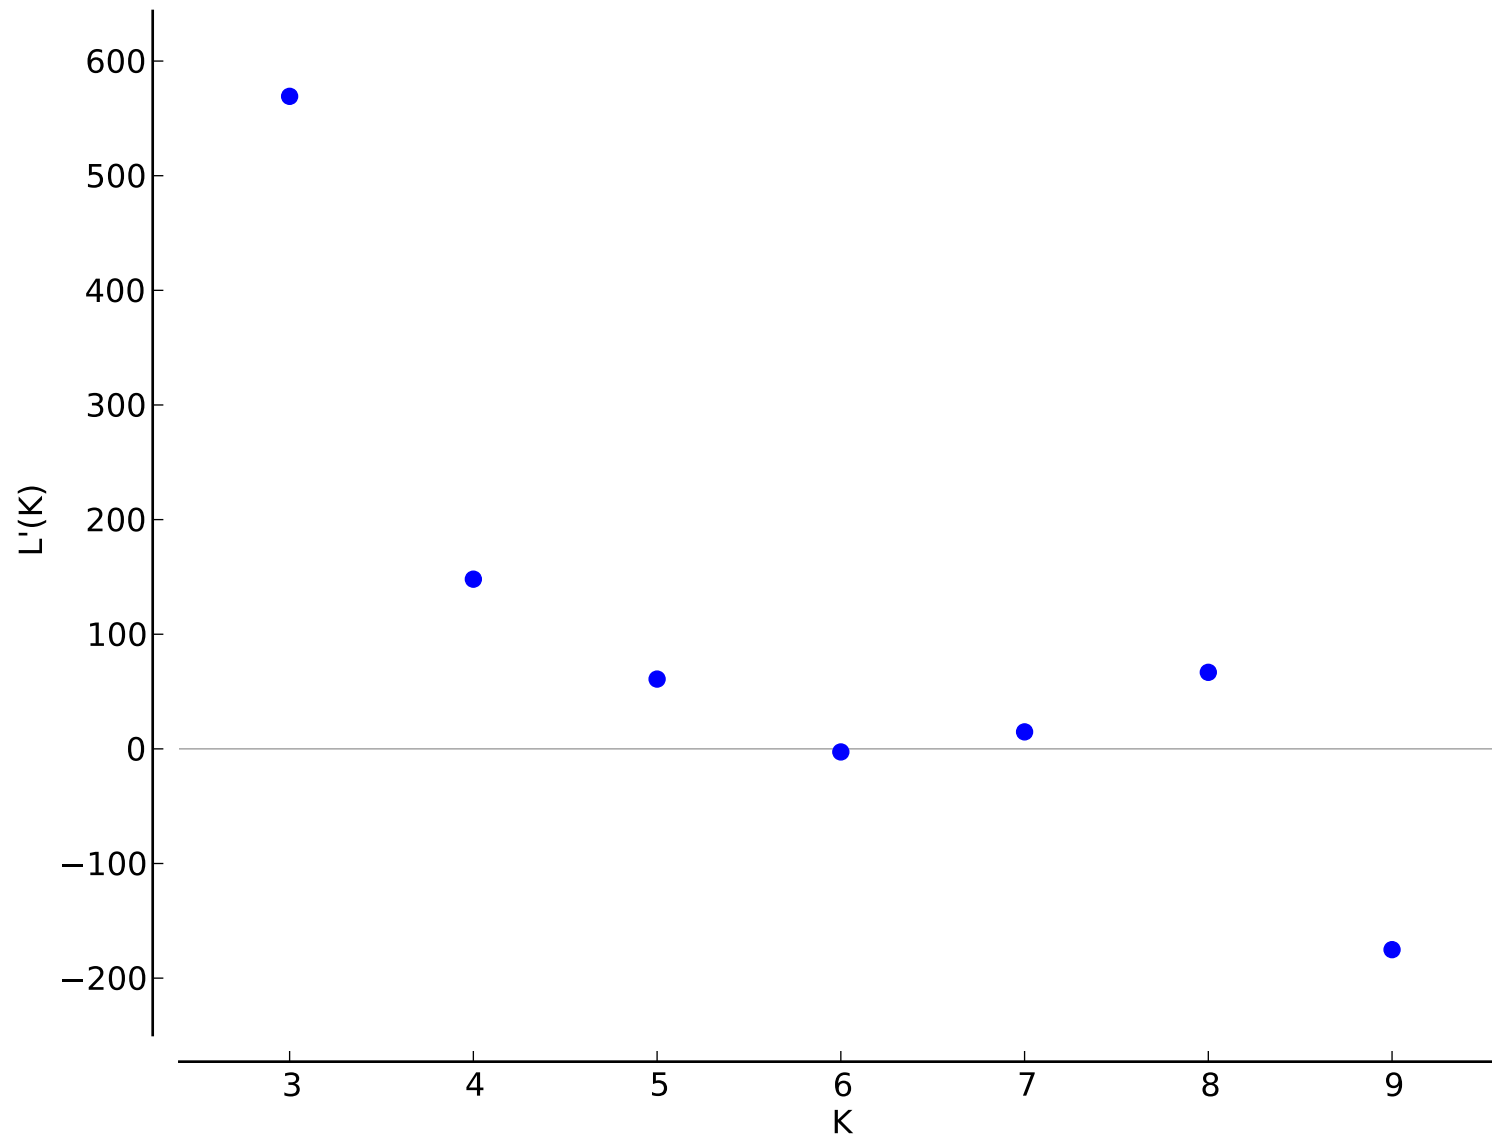

Supplement: Supplementary file 1 [file 1]

$$\text{DeltaK} = \text{mean}(|L''(K)|) / \text{sd}(L(K))$$

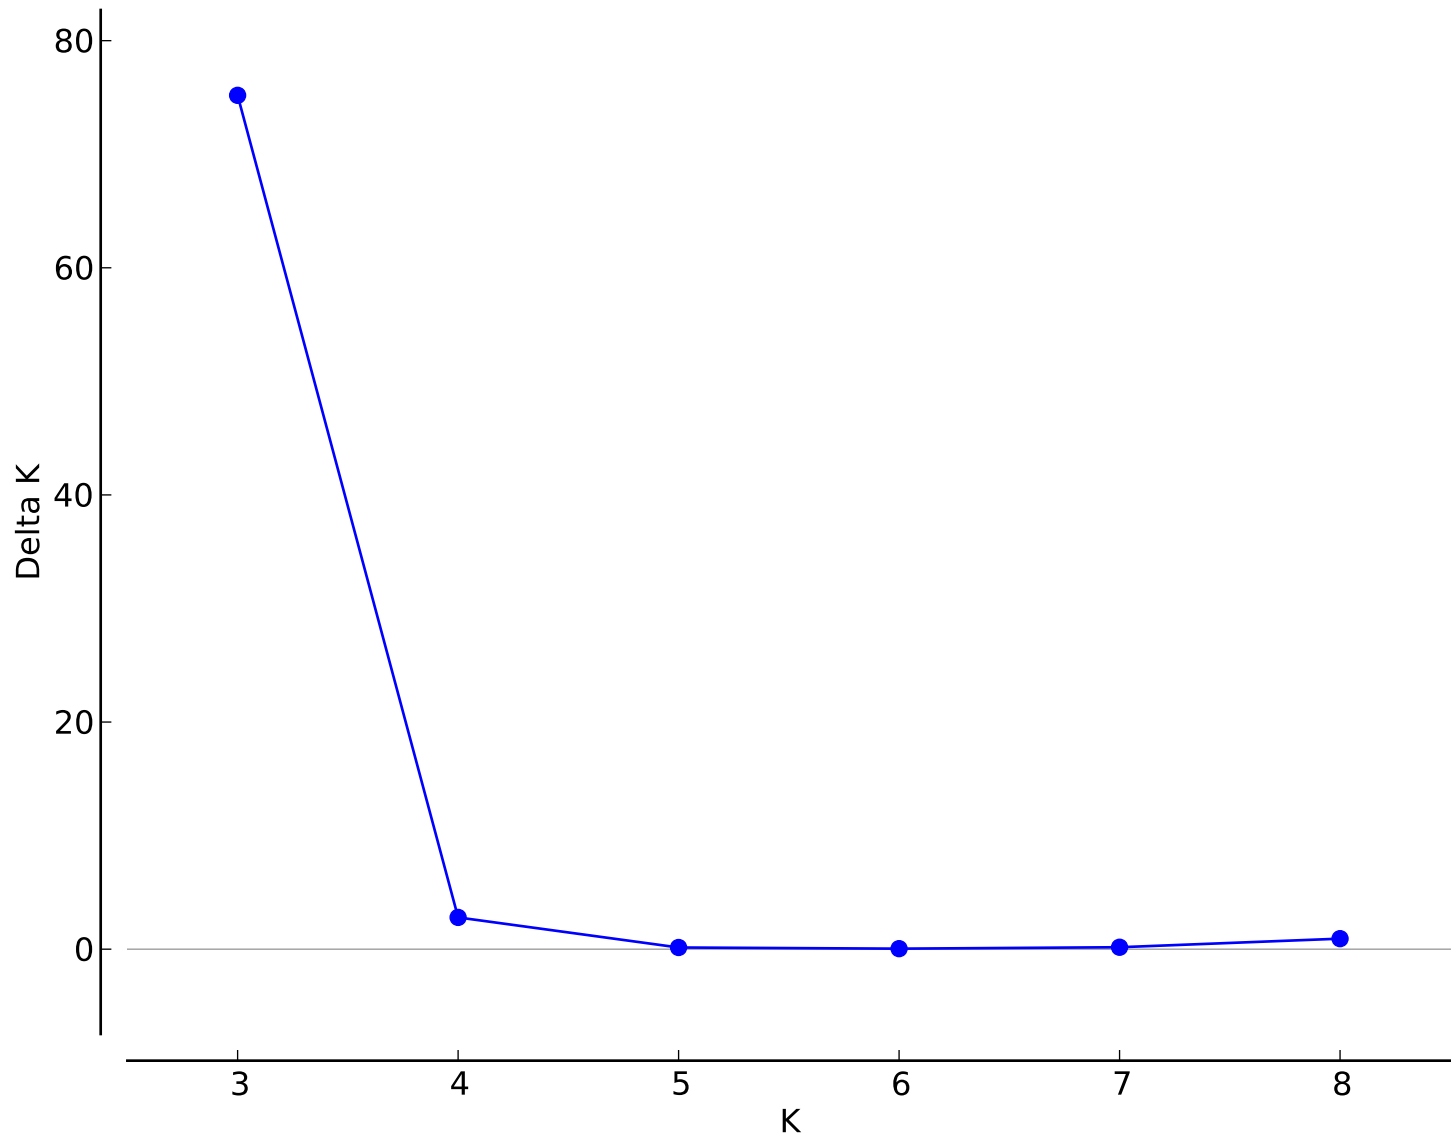

Supplement: Supplementary file 2 [file 1]
